# Supplementary material for: In-depth time-dependent analysis of the benefit of allo-HSCT for elderly patients with CR1 AML: a FILO study
Source: PubMed Central journal article supplement — Blood Adv. 2022 Mar 16;6(6):1804–12. doi: 10.1182/bloodadvances.2021004435 (PMC8941467; doi:10.1182/bloodadvances.2021004435), 2022-03-16

**Supplementary Table 1: Dynamic prediction using the multistate based on a Cox model including age and ELN risk group.**

Predicted probabilities are given for patients with 65 years of age (median of the cohort) and intermediate (A and B) or unfavorable (C and D) ELN risk. State-associated predicted probability represents the probability for being in that specific state at the prediction time given that the patient is in the No-Allo-CR (i.e. event free and not transplanted, A and C) or Allo-CR (i.e. event free after transplantation, B and D) state at the landmark time.

**A) ELN Intermediate / No Allo - CR**

| landmark time in month post CR1 | prediction time in year post CR1 | No Allo - CR | Allo - CR | No Allo - Relapse | No Allo - NRM | Allo - relapse | Allo - NRM |
|---------------------------------|----------------------------------|--------------|-----------|-------------------|---------------|----------------|------------|
| 0                               | 2                                | 17%          | 26%       | 42%               | 4%            | 7%             | 5%         |
| 0                               | 3                                | 12%          | 23%       | 46%               | 5%            | 8%             | 6%         |
| 0                               | 4                                | 9%           | 22%       | 48%               | 6%            | 9%             | 6%         |
| 0                               | 5                                | 8%           | 21%       | 49%               | 6%            | 10%            | 6%         |
| 3                               | 2                                | 21%          | 21%       | 44%               | 3%            | 6%             | 4%         |
| 3                               | 3                                | 15%          | 19%       | 50%               | 4%            | 7%             | 5%         |
| 3                               | 4                                | 12%          | 18%       | 52%               | 5%            | 8%             | 5%         |
| 3                               | 5                                | 10%          | 18%       | 54%               | 6%            | 8%             | 5%         |
| 6                               | 2                                | 36%          | 5%        | 54%               | 4%            | 1%             | 1%         |
| 6                               | 3                                | 25%          | 4%        | 63%               | 6%            | 1%             | 1%         |
| 6                               | 4                                | 20%          | 4%        | 67%               | 8%            | 1%             | 1%         |
| 6                               | 5                                | 16%          | 4%        | 69%               | 8%            | 1%             | 1%         |
| 9                               | 2                                | 45%          | 2%        | 49%               | 4%            | 0%             | 0%         |
| 9                               | 3                                | 31%          | 2%        | 61%               | 6%            | 0%             | 0%         |
| 9                               | 4                                | 25%          | 2%        | 65%               | 8%            | 0%             | 0%         |
| 9                               | 5                                | 20%          | 2%        | 69%               | 9%            | 0%             | 0%         |
| 12                              | 2                                | 53%          | 1%        | 43%               | 3%            | 0%             | 0%         |
| 12                              | 3                                | 37%          | 1%        | 57%               | 6%            | 0%             | 0%         |
| 12                              | 4                                | 29%          | 1%        | 62%               | 8%            | 0%             | 0%         |
| 12                              | 5                                | 24%          | 1%        | 66%               | 9%            | 0%             | 0%         |

**B) ELN Intermediate / Allo - CR**

| landmark time<br>in month post<br>CR1 | prediction<br>time in year<br>post CR1 | No Allo<br>- CR | Allo -<br>CR | No Allo<br>-<br>Relapse | No Allo<br>- NRM | Allo -<br>relapse | Allo -<br>NRM |
|---------------------------------------|----------------------------------------|-----------------|--------------|-------------------------|------------------|-------------------|---------------|
| 0                                     | 2                                      | NA              | NA           | NA                      | NA               | NA                | NA            |
| 0                                     | 3                                      | NA              | NA           | NA                      | NA               | NA                | NA            |
| 0                                     | 4                                      | NA              | NA           | NA                      | NA               | NA                | NA            |
| 0                                     | 5                                      | NA              | NA           | NA                      | NA               | NA                | NA            |
| 3                                     | 2                                      | 0%              | 66%          | 0%                      | 0%               | 19%               | 15%           |
| 3                                     | 3                                      | 0%              | 60%          | 0%                      | 0%               | 23%               | 17%           |
| 3                                     | 4                                      | 0%              | 56%          | 0%                      | 0%               | 26%               | 18%           |
| 3                                     | 5                                      | 0%              | 56%          | 0%                      | 0%               | 26%               | 18%           |
| 6                                     | 2                                      | 0%              | 73%          | 0%                      | 0%               | 16%               | 11%           |
| 6                                     | 3                                      | 0%              | 66%          | 0%                      | 0%               | 20%               | 14%           |
| 6                                     | 4                                      | 0%              | 62%          | 0%                      | 0%               | 23%               | 15%           |
| 6                                     | 5                                      | 0%              | 62%          | 0%                      | 0%               | 24%               | 15%           |
| 9                                     | 2                                      | 0%              | 80%          | 0%                      | 0%               | 12%               | 8%            |
| 9                                     | 3                                      | 0%              | 72%          | 0%                      | 0%               | 16%               | 11%           |
| 9                                     | 4                                      | 0%              | 68%          | 0%                      | 0%               | 20%               | 12%           |
| 9                                     | 5                                      | 0%              | 67%          | 0%                      | 0%               | 21%               | 12%           |
| 12                                    | 2                                      | 0%              | 86%          | 0%                      | 0%               | 10%               | 4%            |
| 12                                    | 3                                      | 0%              | 78%          | 0%                      | 0%               | 14%               | 8%            |
| 12                                    | 4                                      | 0%              | 73%          | 0%                      | 0%               | 18%               | 9%            |
| 12                                    | 5                                      | 0%              | 72%          | 0%                      | 0%               | 19%               | 9%            |

**C) ELN Unfavorable / No Allo - CR**

| landmark time<br>in month post<br>CR1 | prediction<br>time in year<br>post CR1 | No Allo<br>- CR | Allo -<br>CR | No Allo<br>-<br>Relapse | No Allo<br>- NRM | Allo -<br>relapse | Allo -<br>NRM |
|---------------------------------------|----------------------------------------|-----------------|--------------|-------------------------|------------------|-------------------|---------------|
| 0                                     | 2                                      | 5%              | 26%          | 41%                     | 5%               | 13%               | 10%           |
| 0                                     | 3                                      | 3%              | 22%          | 43%                     | 5%               | 16%               | 12%           |
| 0                                     | 4                                      | 2%              | 20%          | 44%                     | 5%               | 17%               | 12%           |
| 0                                     | 5                                      | 1%              | 19%          | 44%                     | 5%               | 18%               | 12%           |
| 3                                     | 2                                      | 8%              | 23%          | 46%                     | 3%               | 12%               | 8%            |
| 3                                     | 3                                      | 4%              | 20%          | 49%                     | 4%               | 14%               | 10%           |
| 3                                     | 4                                      | 3%              | 18%          | 49%                     | 4%               | 15%               | 10%           |
| 3                                     | 5                                      | 2%              | 17%          | 50%                     | 5%               | 15%               | 10%           |
| 6                                     | 2                                      | 18%             | 6%           | 67%                     | 5%               | 2%                | 1%            |
| 6                                     | 3                                      | 10%             | 5%           | 74%                     | 7%               | 2%                | 2%            |
| 6                                     | 4                                      | 7%              | 5%           | 76%                     | 8%               | 3%                | 2%            |
| 6                                     | 5                                      | 5%              | 5%           | 78%                     | 8%               | 3%                | 2%            |
| 9                                     | 2                                      | 26%             | 3%           | 65%                     | 5%               | 1%                | 0%            |
| 9                                     | 3                                      | 14%             | 2%           | 75%                     | 7%               | 1%                | 0%            |
| 9                                     | 4                                      | 10%             | 2%           | 79%                     | 8%               | 1%                | 1%            |
| 9                                     | 5                                      | 7%              | 2%           | 81%                     | 9%               | 1%                | 1%            |
| 12                                    | 2                                      | 35%             | 1%           | 60%                     | 4%               | 0%                | 0%            |
| 12                                    | 3                                      | 19%             | 1%           | 73%                     | 7%               | 0%                | 0%            |
| 12                                    | 4                                      | 13%             | 1%           | 78%                     | 9%               | 0%                | 0%            |
| 12                                    | 5                                      | 9%              | 1%           | 81%                     | 9%               | 0%                | 0%            |

**D) ELN Unfavorable / Allo - CR**

| landmark time<br>in month post<br>CR1 | prediction<br>time in year<br>post CR1 | No Allo<br>- CR | Allo -<br>CR | No Allo<br>-<br>Relapse | No Allo<br>- NRM | Allo -<br>relapse | Allo -<br>NRM |
|---------------------------------------|----------------------------------------|-----------------|--------------|-------------------------|------------------|-------------------|---------------|
| 0                                     | 2                                      | NA              | NA           | NA                      | NA               | NA                | NA            |
| 0                                     | 3                                      | NA              | NA           | NA                      | NA               | NA                | NA            |
| 0                                     | 4                                      | NA              | NA           | NA                      | NA               | NA                | NA            |
| 0                                     | 5                                      | NA              | NA           | NA                      | NA               | NA                | NA            |
| 3                                     | 2                                      | 0%              | 50%          | 0%                      | 0%               | 28%               | 22%           |
| 3                                     | 3                                      | 0%              | 42%          | 0%                      | 0%               | 32%               | 25%           |
| 3                                     | 4                                      | 0%              | 38%          | 0%                      | 0%               | 36%               | 26%           |
| 3                                     | 5                                      | 0%              | 38%          | 0%                      | 0%               | 36%               | 26%           |
| 6                                     | 2                                      | 0%              | 60%          | 0%                      | 0%               | 24%               | 16%           |
| 6                                     | 3                                      | 0%              | 50%          | 0%                      | 0%               | 29%               | 21%           |
| 6                                     | 4                                      | 0%              | 46%          | 0%                      | 0%               | 33%               | 21%           |
| 6                                     | 5                                      | 0%              | 45%          | 0%                      | 0%               | 34%               | 21%           |
| 9                                     | 2                                      | 0%              | 69%          | 0%                      | 0%               | 19%               | 12%           |
| 9                                     | 3                                      | 0%              | 58%          | 0%                      | 0%               | 25%               | 17%           |
| 9                                     | 4                                      | 0%              | 53%          | 0%                      | 0%               | 29%               | 18%           |
| 9                                     | 5                                      | 0%              | 51%          | 0%                      | 0%               | 30%               | 18%           |
| 12                                    | 2                                      | 0%              | 78%          | 0%                      | 0%               | 15%               | 7%            |
| 12                                    | 3                                      | 0%              | 66%          | 0%                      | 0%               | 22%               | 12%           |
| 12                                    | 4                                      | 0%              | 60%          | 0%                      | 0%               | 27%               | 13%           |
| 12                                    | 5                                      | 0%              | 58%          | 0%                      | 0%               | 28%               | 13%           |

**Supplementary table 2: Multivariate Cox model from the dynamic super landmark model**

|                            | Relapse               |               |        | Non-Relapse Mortality |               |        |
|----------------------------|-----------------------|---------------|--------|-----------------------|---------------|--------|
|                            | HR <sup>\$</sup>      | 95%CI         | p      | HR <sup>\$</sup>      | 95%CI         | p      |
| <b>Allo-HSCT*</b>          |                       |               |        |                       |               |        |
| no                         | 1                     |               |        |                       |               |        |
| yes                        | 0.29                  | (0.21 - 0.41) | <0.001 | 2.36                  | (1.26 - 4.45) | 0.008  |
| <b>Age</b>                 | 1.04                  | (1.00 - 1.08) | 0.068  | 1.00                  | (0.92 - 1.09) | 0.928  |
| <b>ELN risk</b>            |                       |               |        |                       |               |        |
| Intermediate               | 1                     |               |        | 1                     |               |        |
| Unfavorable                | 1.69                  | (1.26 - 2.25) | <0.001 | 1.05                  | (0.61 - 1.79) | 0.861  |
| <b>N induction courses</b> |                       |               |        |                       |               |        |
| one                        | 1                     |               |        | 1                     |               |        |
| two                        | 1.38                  | (0.88 - 2.16) | 0.166  | 0.30                  | (0.07 - 1.32) | 0.111  |
| <b>Treatment period</b>    |                       |               |        |                       |               |        |
| 2007-10                    | 1                     |               |        | 1                     |               |        |
| 2011-13                    | 1.05                  | (0.78 - 1.42) | 0.746  | 0.67                  | (0.34 - 1.33) | 0.251  |
| 2014-17                    | 0.88                  | (0.65 - 1.19) | 0.408  | 1.09                  | (0.59 - 2.00) | 0.788  |
|                            | Relapse-Free Survival |               |        | Overall Survival      |               |        |
|                            | HR                    | 95%CI         | p      | HR                    | 95%CI         | p      |
| <b>Allo-HSCT*</b>          |                       |               |        |                       |               |        |
| no                         |                       |               |        |                       |               |        |
| yes                        | 0.47                  | (0.36 - 0.62) | <0.001 | 0.54                  | (0.40 - 0.72) | <0.001 |
| <b>Age</b>                 | 1.03                  | (1.00 - 1.07) | 0.082  | 1.04                  | (1.00 - 1.08) | 0.073  |
| <b>ELN risk</b>            |                       |               |        |                       |               |        |
| Intermediate               | 1                     |               |        | 1                     |               |        |
| Unfavorable                | 1.54                  | (1.19 - 1.98) | 0.001  | 1.64                  | (1.24 - 2.16) | <0.001 |
| <b>N induction courses</b> |                       |               |        |                       |               |        |
| one                        | 1                     |               |        | 1                     |               |        |
| two                        | 1.06                  | (0.68 - 1.66) | 0.784  | 1.12                  | (0.71 - 1.77) | 0.629  |
| <b>Treatment period</b>    |                       |               |        |                       |               |        |
| 2007-10                    | 1                     |               |        | 1                     |               |        |
| 2011-13                    | 0.98                  | (0.75 - 1.28) | 0.877  | 1.00                  | (0.75 - 1.34) | 0.995  |
| 2014-17                    | 0.93                  | (0.72 - 1.22) | 0.609  | 0.98                  | (0.73 - 1.30) | 0.875  |

<sup>\$</sup>Cause specific HR. \*Allo-HSCT was considered as categorical covariate (yes or no) according to transplantation status at each landmark time

**Supplementary Figure 1: Transplantation rates and causes of not proceeding to Allo-HSCT over years**

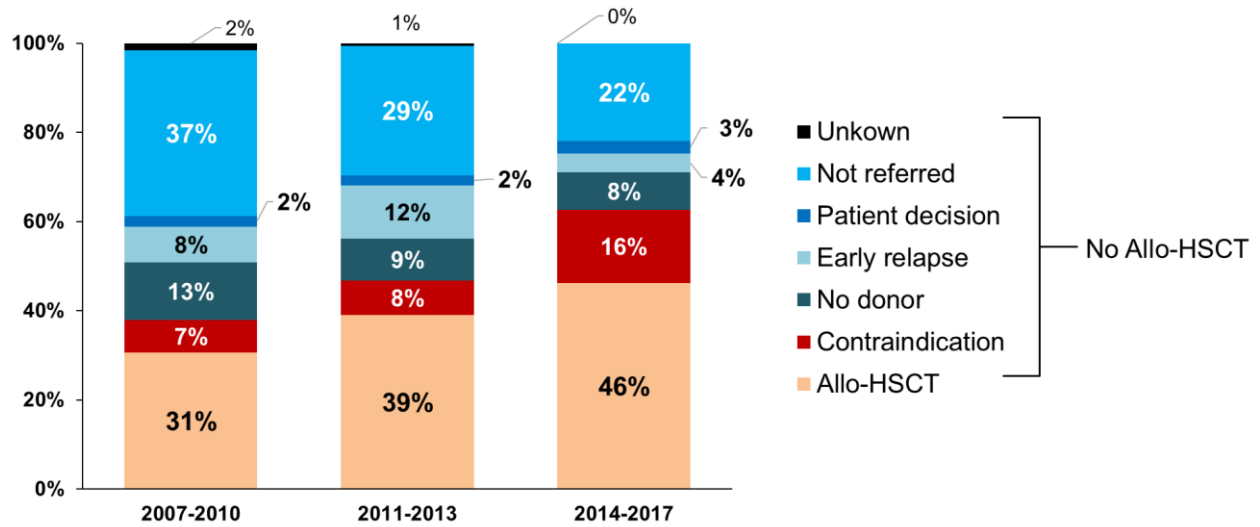

**Supplementary Figure 2: Impact of Allo-HSCT on RFS in intermediate-1 (left panel) and intermediate-2 (right panel) ELN risk group**

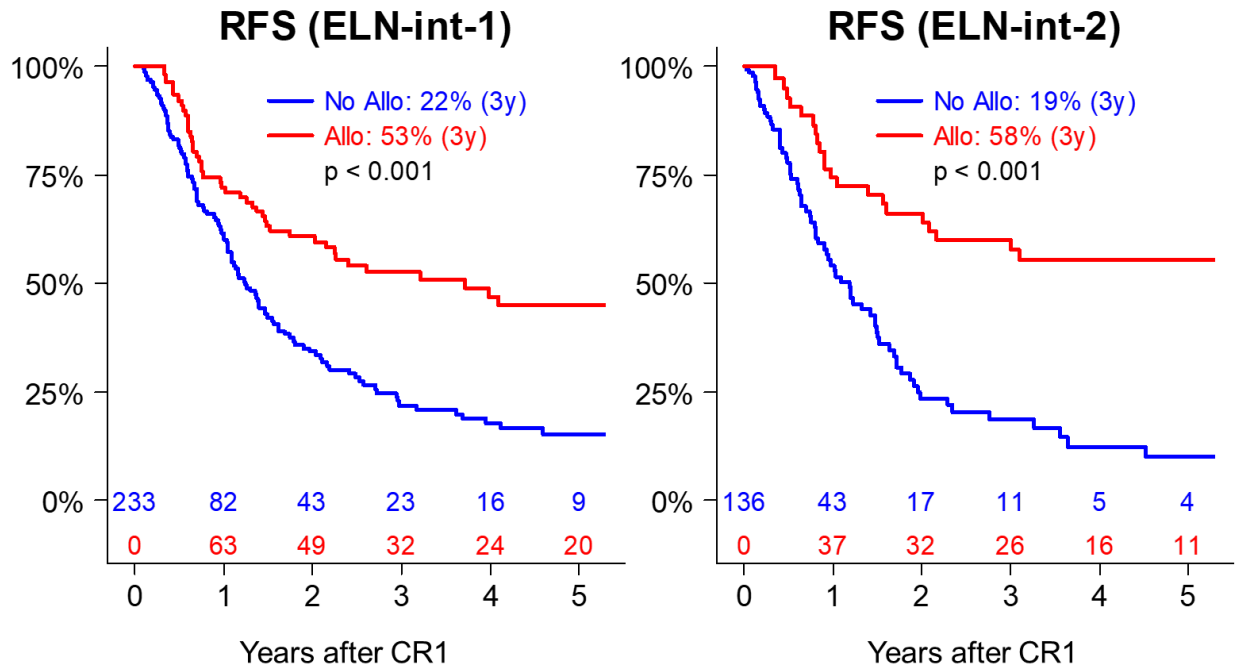

**Supplementary Figure 3: Impact of Allo-HSCT on RFS in ELN intermediate (left panel) and unfavorable (right panel) risk subgroups, after exclusion of patients who did not undergo Allo-HSCT because of contraindication or early AML relapse.**

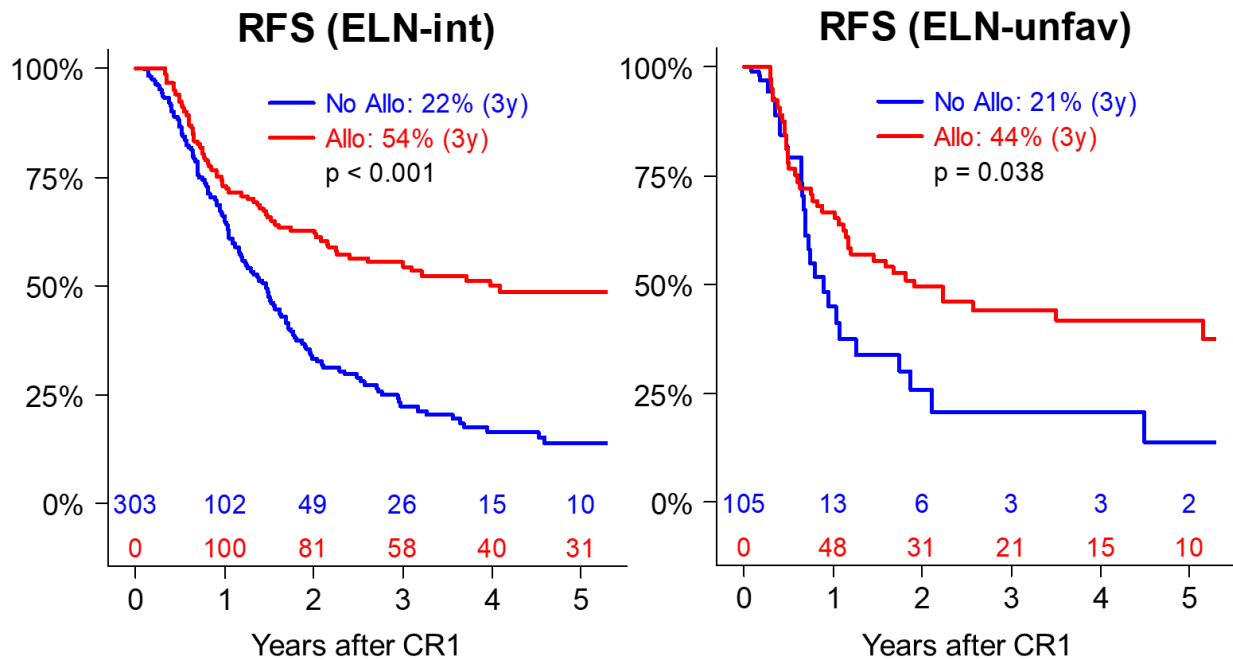



**Supplementary Figure 4: Simon Makuch plots of RFS (left panel) and OS (right panel) considering Allo-HSCT as time dependent variable in a 6-month landmark analysis.**

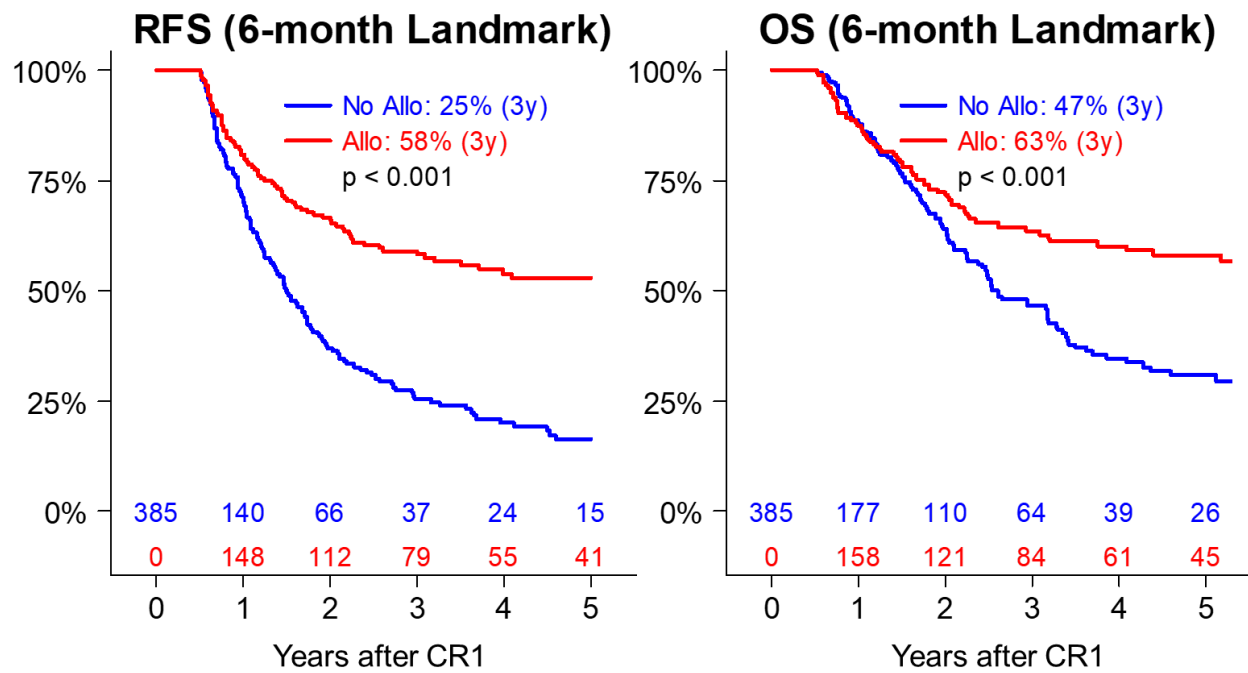

### Supplementary Figure 5: Censoring distribution.

Plotted as a reverse Kaplan-Meier curve for patients with no event for RFS at last contact.

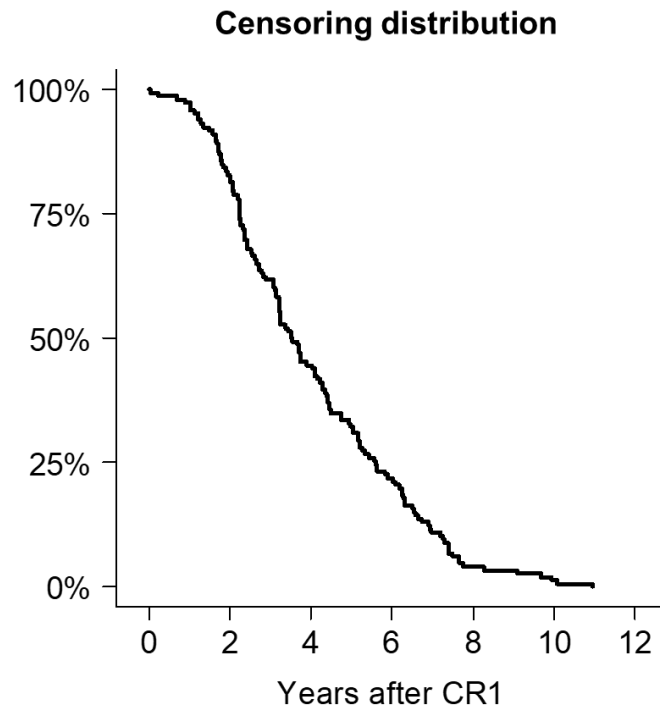

### Supplementary Figure 6: Cumulative hazard for state transition of the multistate model.

Predictions are given for a patient of 65 years of age and intermediate (upper panel) or unfavorable (lower panel) ELN risk AML.

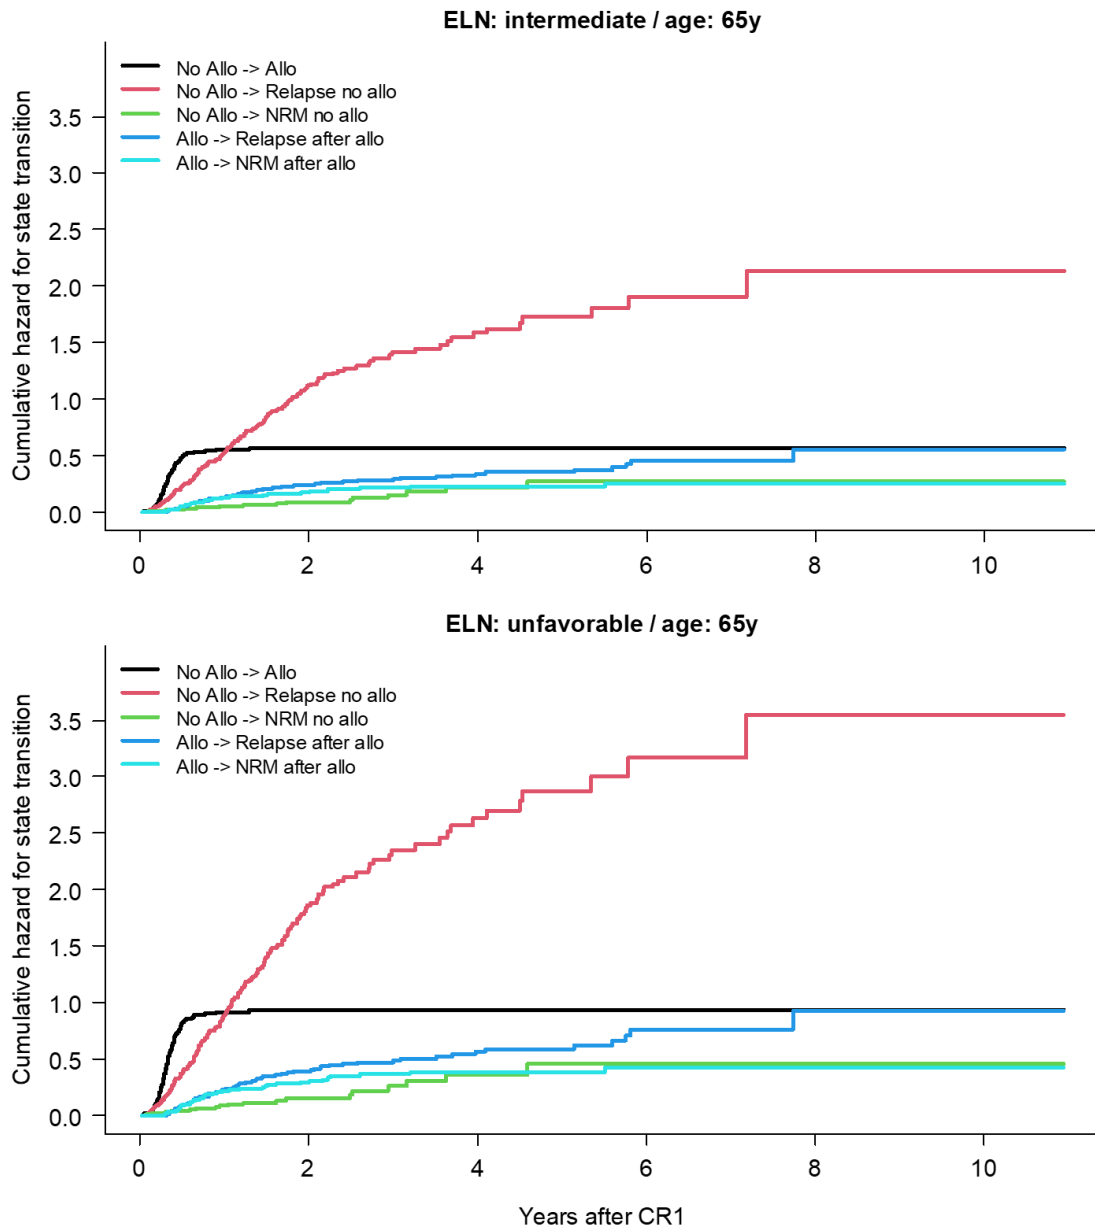

## Supplementary Figure 7: Dynamic landmarking.

Distribution of current values of the “Allo” variable (red: Allo=yes; blue: Allo=no) among patients at risk of event for RFS at each landmark time (every month from CR1 up to 5 years).

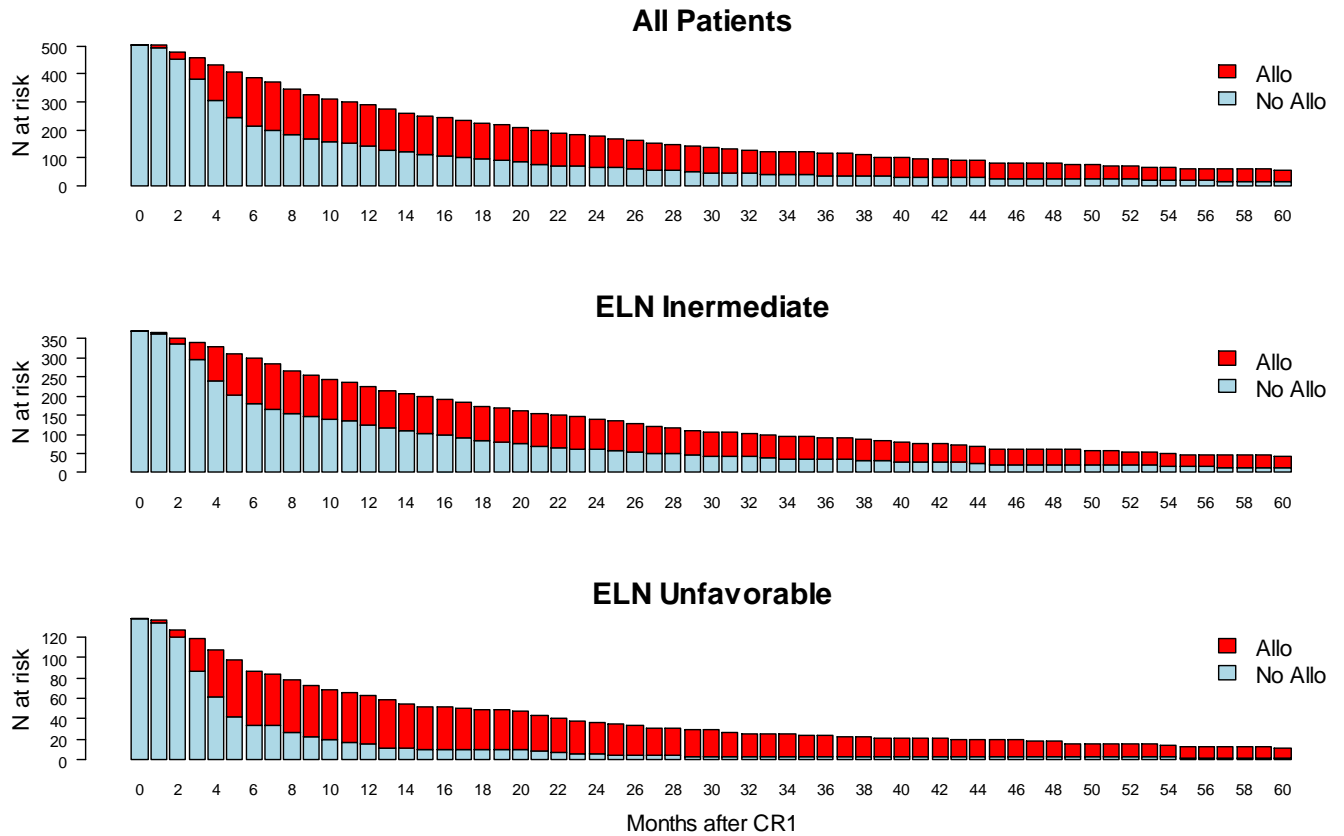

Supplement: advancesADV2021004435-suppl1.pdf [file advancesADV2021004435-suppl1.pdf]
